# Supplementary material
Source: Frontiers journal article supplement (https://www.frontiersin.org/articles/527865)
Supplement: Data_Sheet_1.pdf [file Data_Sheet_1.pdf]

## Supplementary Material

### 1. Supplementary Figures

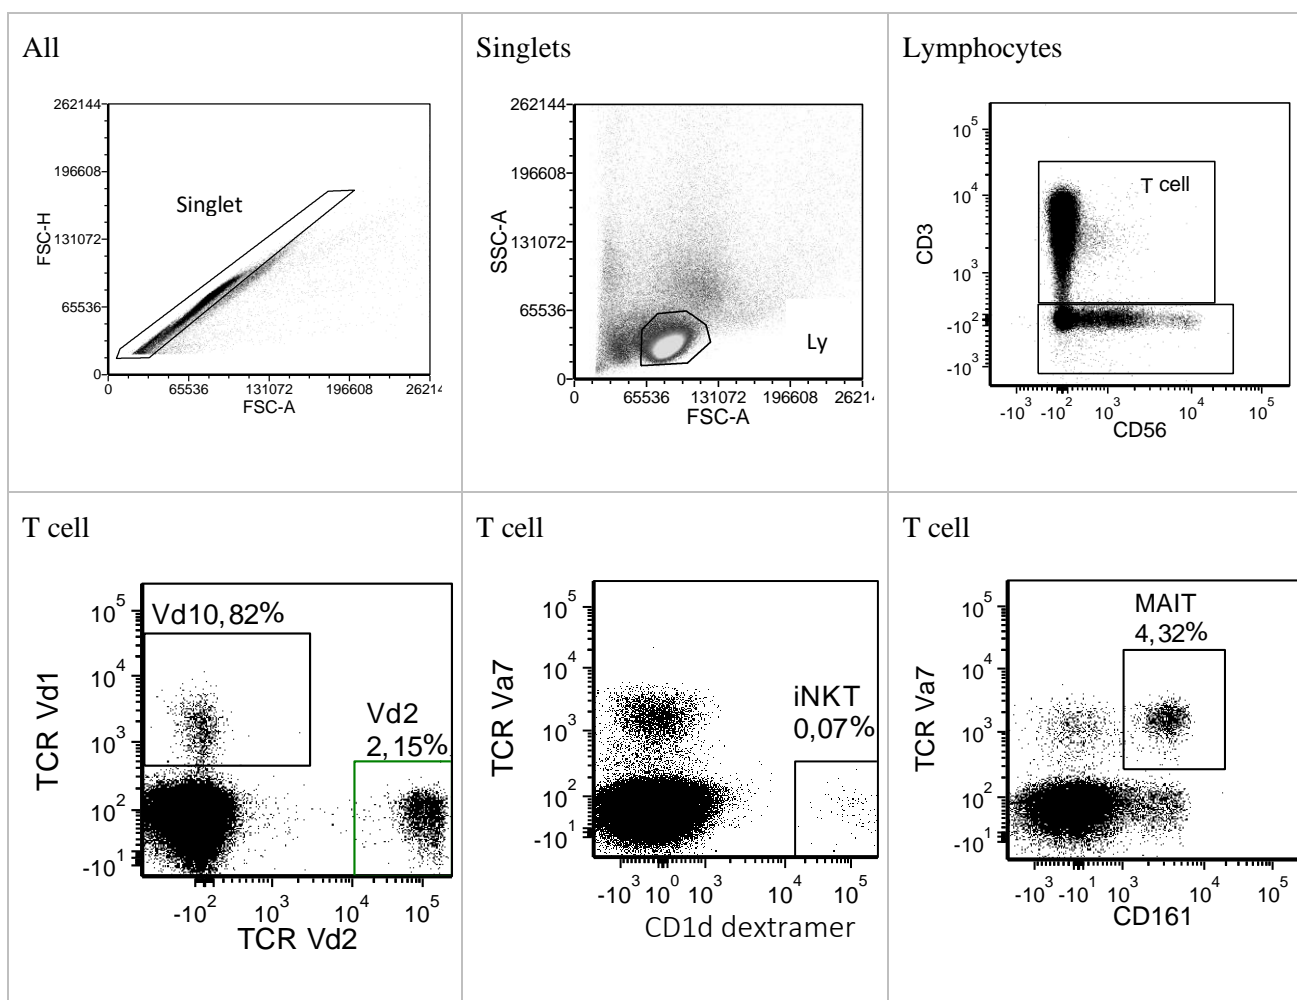

**Supplementary Figure 1.** Gating Strategy for lymphocyte subpopulations. Surface marker expression on PBMCs was assessed by flow cytometry in 8 Slovenian patients and 8 age matched control subjects. Cells were stained in flow cytometry buffer (PBS (pH 7.2), 2mM EDTA, 0.5% BSA) for 20 min at room temperature in dark with antibodies listed in Supplementary Table 2. After staining cells were analyzed using LSRFortessa flow cytometer (BD Biosciences) and FCS Express 5 Flow (De Novo) software. The optical detector configuration can be found in Supplementary Table 3. Singlets and lymphocytes (Ly) are identified by their scatter properties (FSC-A x FSC-H plot, FSC-A x SSC-A plot respectively). Numbers in gates denote percent positive cells.

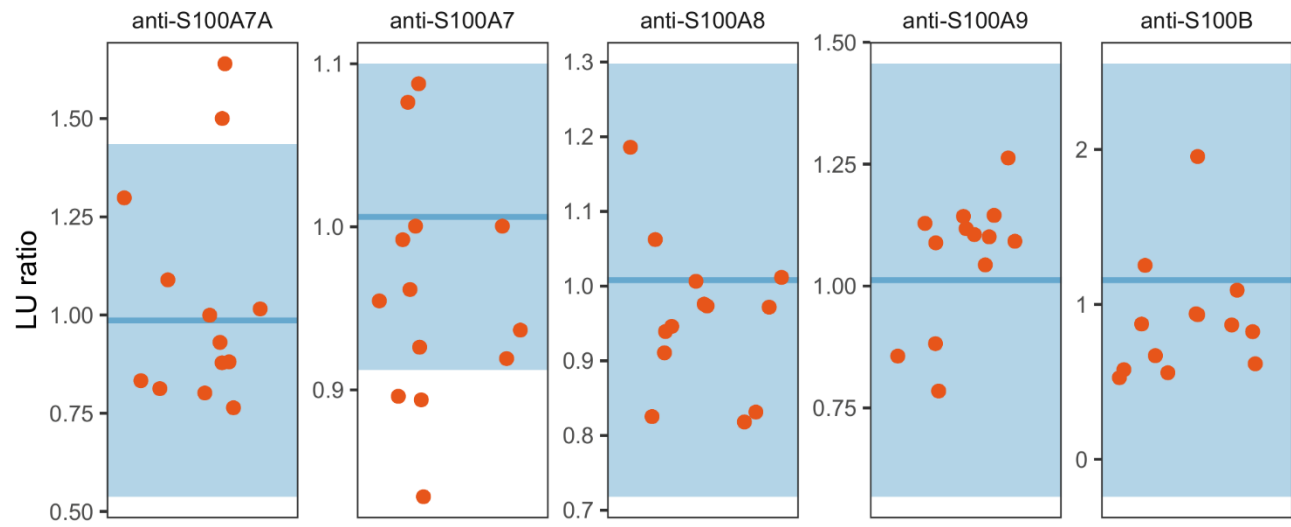

**Supplementary Figure 2.** Autoantibodies detected from plasma. Luciferase based immunoprecipitation system (LIPS) assay was conducted on plasma samples (13 patients and 7 controls). The results were expressed as luminescence units (LU) representing the fold over the mean of the healthy control samples. The horizontal blue line represents the geometric mean of the LU of the control sample group (plasma  $n = 7$ ). The transparent blue area shows normal range e.g.  $\pm 3$  standard deviations of the geometric mean.

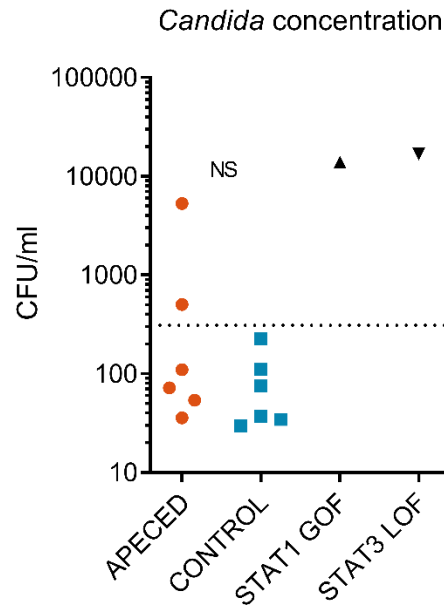

**Supplementary Figure 3.** *Candida* concentration (CFU/ml) in saliva was measured in 6 APECED patient, 6 control and as a positive control in two patients with different monogenic diseases with CMC: STAT1 GOF and STAT3 LOF. DNA from saliva samples and cultured laboratory strain SC5314 (ATCC, VA, US) of *Candida albicans* was extracted from saliva samples using the DNeasy PowerSoil Kit (QIAGEN) according to manufacturer's protocol and homogenized with Precellys 24 Homogenizer (Bertin Instruments). The concentration of *Candida* cells in patient samples was calculated based on the calibration curve constructed according to the Ct values of serially diluted *C. albicans* probes (starting from 2E7 CFU/ml). The normal range of *Candida* concentration was calculated based on healthy control values: mean + 3 standard deviations (dotted line). Statistical significance was assessed with the unpaired t-test using the Graphpad Prism software. NS – not significant.

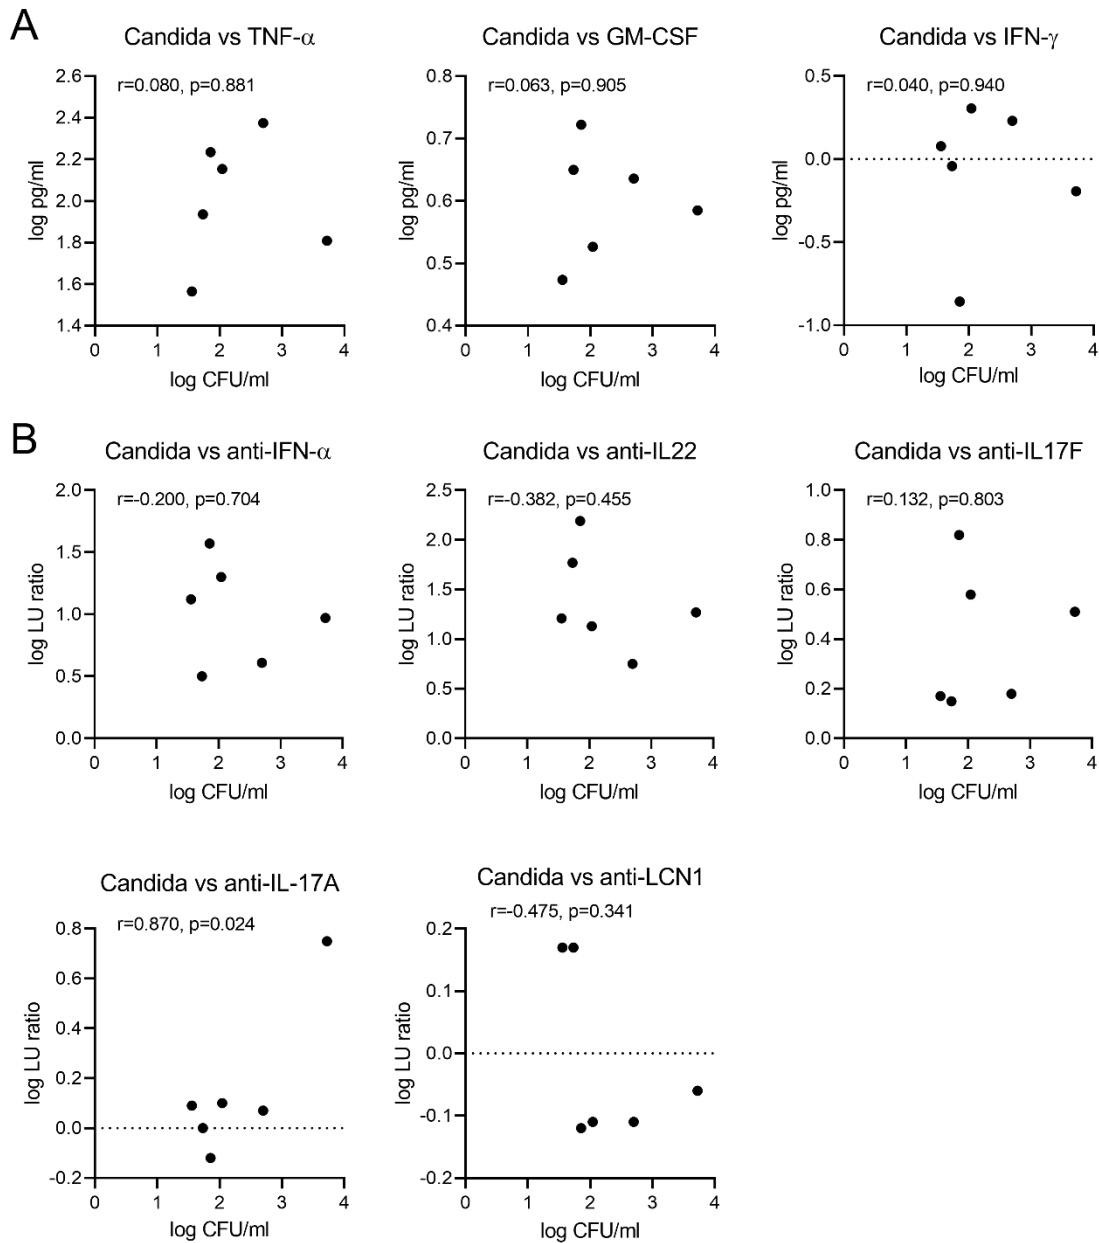

**Supplementary Figure 4.** Correlation analysis between *Candida* concentration (CFU/ml) and significantly increased cytokines (A) and also autoantibody levels (B) from saliva. Measurements were done in 6 APECED patient samples from saliva. Values were log transformed.

## Network Shapes

|                                                                                     |                                 |
|-------------------------------------------------------------------------------------|---------------------------------|
|    | Complex/Group                   |
|    | Chemical/Drug/Toxicant          |
|    | Cytokine                        |
|    | Disease                         |
|    | Enzyme                          |
|    | Function                        |
|    | G-protein Coupled Receptor      |
|    | Growth Factor                   |
|    | Ion Channel                     |
|    | Kinase                          |
|    | Ligand-dependent Nuclear Recept |
|    | Mature microRNA                 |
|    | microRNA                        |
|   | Other                           |
|  | Peptidase                       |
|  | Phosphatase                     |
|  | Transcription Regulator         |
|  | Translation Regulator           |
|  | Transmembrane Receptor          |
|  | Transporter                     |

## Relationships

|                                                                                     |                                                                                                                                                                                                          |
|-------------------------------------------------------------------------------------|----------------------------------------------------------------------------------------------------------------------------------------------------------------------------------------------------------|
|    | chemical-chemical interactions, chemical-protein interactions, correlation, protein-protein interactions, RNA-RNA interactions: non targeting interactions                                               |
|    | activation, causation, expression, localization, membership, modification, molecular cleavage, phosphorylation, protein-DNA interactions, protein-RNA interactions, regulation of binding, transcription |
|    | inhibition, ubiquitination                                                                                                                                                                               |
|    | inhibits and acts on                                                                                                                                                                                     |
|    | leads to                                                                                                                                                                                                 |
|    | processing yields                                                                                                                                                                                        |
|    | RNA-RNA interactions: microRNA targeting                                                                                                                                                                 |
|    | translocation                                                                                                                                                                                            |
|    | reaction                                                                                                                                                                                                 |
|   | enzyme catalysis                                                                                                                                                                                         |
|  | direct interaction                                                                                                                                                                                       |
|  | indirect interaction                                                                                                                                                                                     |

**Supplementary Figure 5.** Figure legend for the main features of IPA network analysis of Figure 4 in the main text.

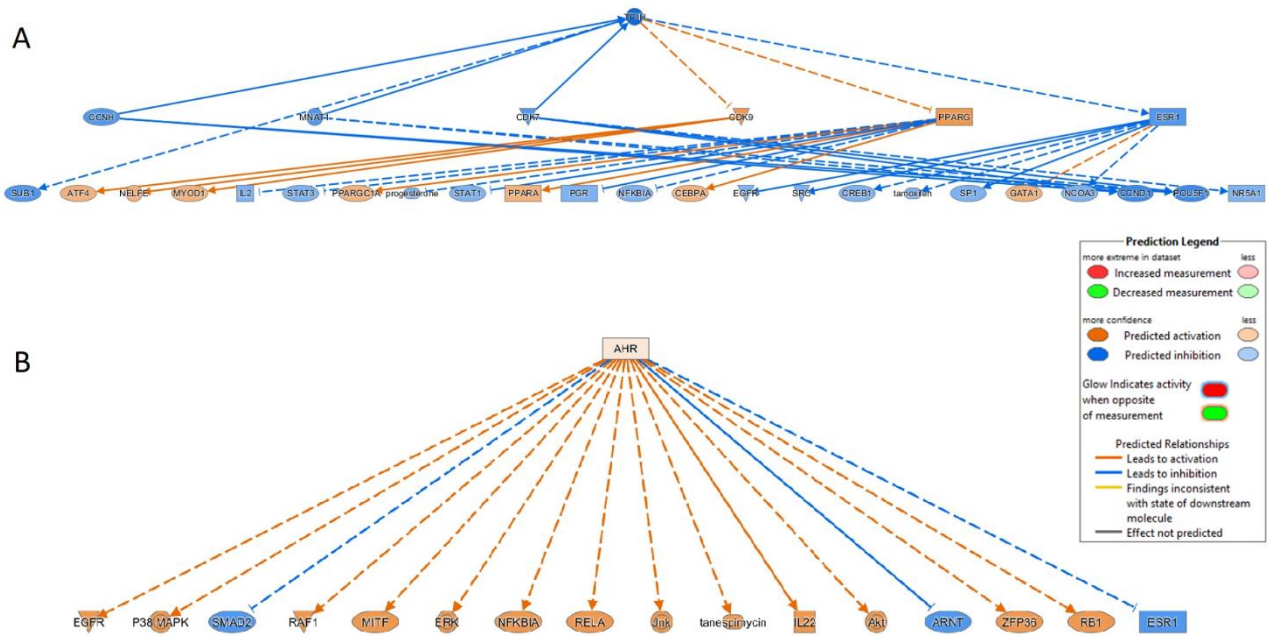

**Supplementary Figure 6.** Causal networks of top 2 master regulators: TFIH (A) and AHR (B). The visual representation of the regulatory network that represents possible causes and underlying mechanisms for observed gene expression changes in a given data set. They are constructed hierarchically with a master regulator at the top.

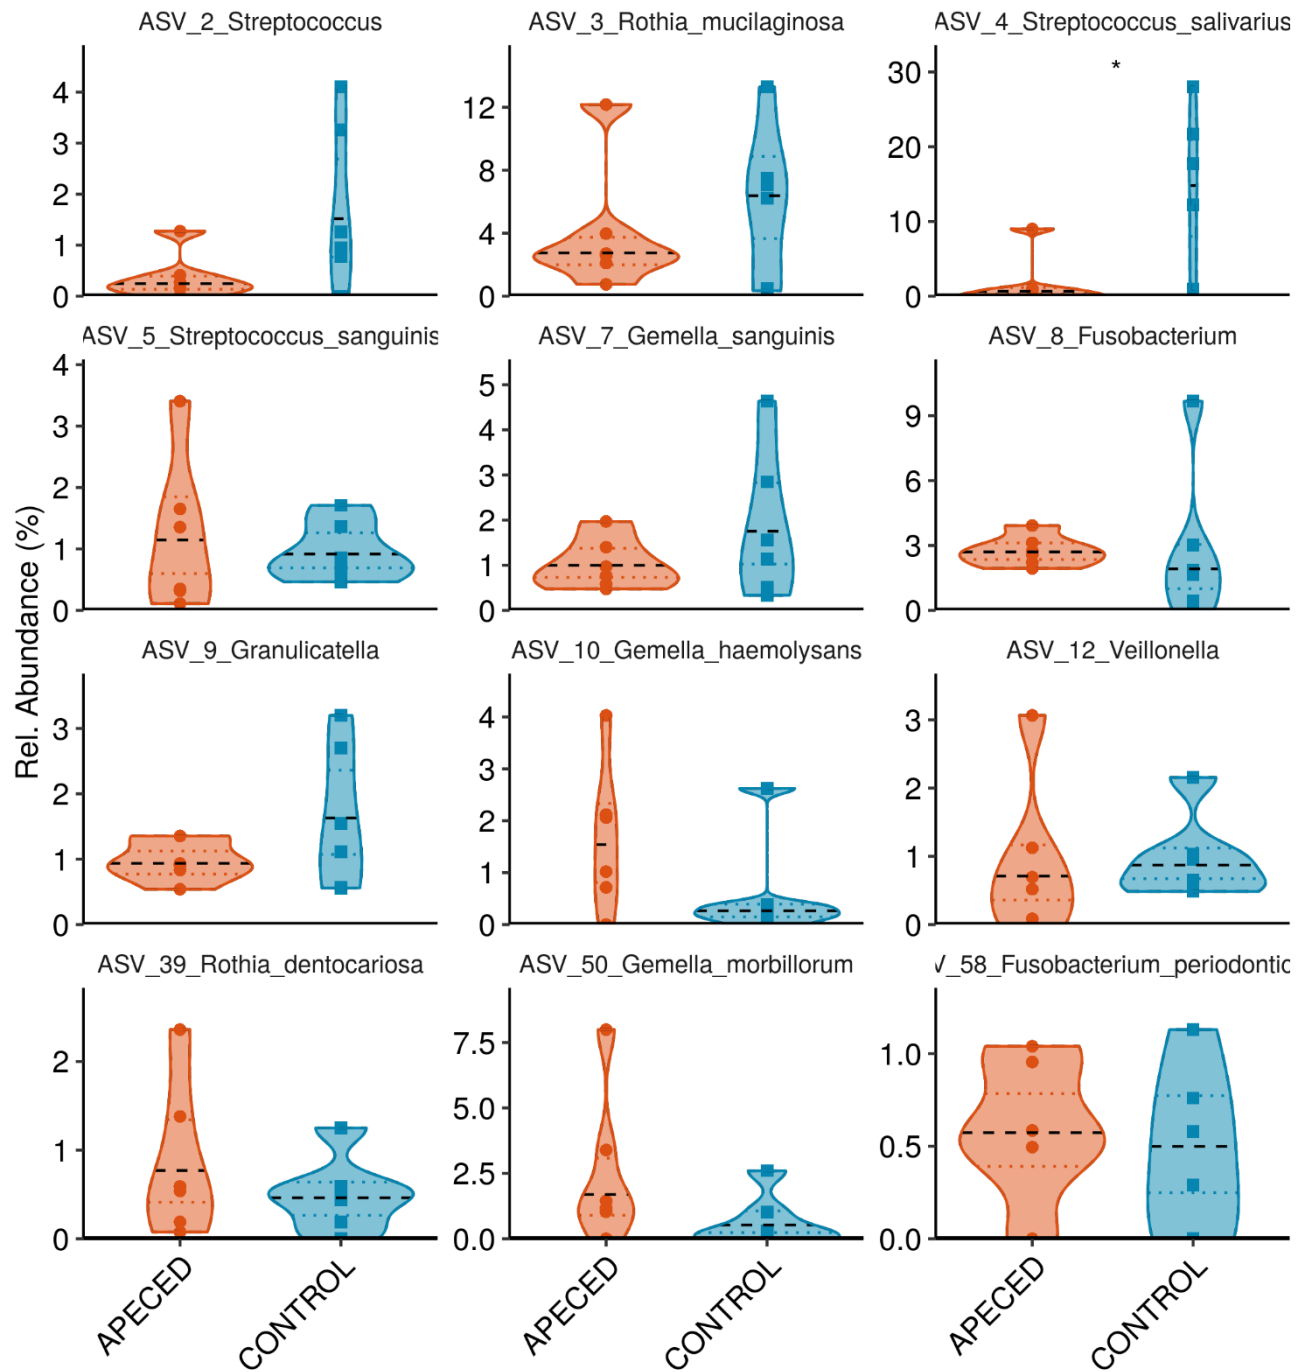

**Supplementary Figure 7.** Profiles of the relative abundance per group at ASV level in studied groups. Microbiota from salivary samples were analyzed in 6 APECED patients and 6 age-matched healthy controls. Analysis was performed using Wilcoxon rank sum test using only taxa with median abundance > 100 sequence counts (= 0.5% relative abundance) and prevalence > 0.3 (= present in at least 4 samples) (\*  $p < 0.05$ ).

| Case | Mutation | Age at sample collection | Gender | Clinical phenotype | Plasma autoantibodies                                                     | Candida detection                                                                                                                                   | Experiments                                                                                       |
|------|----------|--------------------------|--------|--------------------|---------------------------------------------------------------------------|-----------------------------------------------------------------------------------------------------------------------------------------------------|---------------------------------------------------------------------------------------------------|
|      |          |                          |        |                    | Anti-IFN $\alpha$ cocktail<br>Anti- IL-17A<br>Anti- IL-17F<br>Anti- IL-22 | Visible <i>Candida</i> infection in the mouth at the time of the sampling<br><br>Mouth swap / <i>Candida</i> CFU per ml<br><br>Antifungal treatment | Saliva autoantibodies<br><br>Flow cytometry<br><br>Expression analysis<br><br>Microbiota analysis |

|            |                       |    |   |                                                                     |   |   |   |   |                                                                                    |                                                          |                                                                     |   |   |   |   |
|------------|-----------------------|----|---|---------------------------------------------------------------------|---|---|---|---|------------------------------------------------------------------------------------|----------------------------------------------------------|---------------------------------------------------------------------|---|---|---|---|
| <b>PT1</b> | R257X/T16M            | 21 | F | CMC,<br>HP, MA,<br>EH                                               | + | - | - | + | no changes<br>visible on<br>mucous<br>membranes                                    | <i>Candida<br/>albicans</i><br>positive                  | no                                                                  | ✓ | ✓ | ✓ |   |
| <b>PT2</b> | R257X/T16M            | 16 | M | CMC,<br>AD, HP,<br>HT, MA,<br>EH, AL                                | + | - | + | + | no changes<br>visible on<br>mucous<br>membranes                                    | <i>Candida<br/>albicans</i><br>neg                       | no                                                                  | ✓ |   | ✓ |   |
| <b>PT3</b> | 21-43dup23bp x2       | 15 | M | CMC                                                                 | + | + | + | + | no changes<br>visible on<br>mucous<br>membranes                                    | <i>Candida<br/>albicans</i><br>neg                       | no                                                                  | ✓ |   | ✓ |   |
| <b>PT4</b> | 1064-1068dupCCCCGG x2 | 23 | M | CMC,<br>HP, GI,<br>HT, MA,<br>EH                                    | + | + | + | + | Numerous<br><i>Candida</i><br>plaques in<br>the mouth,<br>redness of<br>the mucosa | <i>Candida<br/>albicans</i><br>positive                  | no                                                                  | ✓ |   | ✓ |   |
| <b>PT5</b> | R257X/R257X           | 26 | M | CMC,<br>AD, HP,<br>HT, K                                            | + | + | + | + | <i>Candida</i><br>plaques on<br>the tongue                                         | <i>Candida<br/>albicans</i><br>positive /<br><b>5281</b> | no                                                                  | ✓ | ✓ |   | ✓ |
| <b>PT6</b> | R257X/T16M            | 23 | M | CMC,<br>AD, GI,<br>GHD,<br>HT, PF,<br>K, EH,<br>ND, DD              | + | + | + | + |                                                                                    |                                                          |                                                                     | ✓ | ✓ |   |   |
| <b>PT7</b> | R257X/R257X           | 33 | M | CMC,<br>AD, HP,<br>MA, V,<br>AL, PV,<br>E, AC,<br>HC,<br>HTE,<br>DY | + | - | + | + | no changes<br>visible on<br>mucous<br>membranes                                    | <i>Candida<br/>albicans</i><br>positive /<br><b>501</b>  | no                                                                  | ✓ | ✓ |   | ✓ |
| <b>PT8</b> | R257X/R257X           | 20 | M | CMC,<br>AD, GI,<br>AIH,<br>AL,<br>STD,                              | + | + | + | + | the plaques<br>of trush<br>visible on<br>tongue,<br>buccal                         | <i>Candida<br/>albicans</i><br>positive /<br>110         | Lamisil<br>(terbinafine)<br>1 tbl a 250<br>mg/ day for 3<br>months, | ✓ | ✓ |   | ✓ |

|             |                      |    |   |                                                        |   |   |   |   |                                                 |                                                 |                  |   |   |  |   |
|-------------|----------------------|----|---|--------------------------------------------------------|---|---|---|---|-------------------------------------------------|-------------------------------------------------|------------------|---|---|--|---|
|             |                      |    |   | VA, SS,<br>DP, SD,<br>OB,<br>GLI, IR,<br>AN,<br>SD/AIH |   |   |   |   | mucosa and<br>palate                            |                                                 | Mikonazol<br>gel |   |   |  |   |
| <b>PT9</b>  | 21-43dup23bp         | 8  | M | CMC,<br>HP                                             | + | + | + | + | angular<br>cheilitis                            | minimal<br><i>Candida<br/>albicans</i><br>/ 72  | no               | ✓ | ✓ |  | ✓ |
| <b>PT10</b> | R257X/R257X          | 4  | F | CMC,<br>HP, EH                                         | + | - | + | + | normal<br>mucous<br>membranes                   | <i>Candida<br/>albicans</i><br>positive /<br>54 | no               | ✓ | ✓ |  | ✓ |
| <b>PT11</b> | R257X/653-7_-5delCTC | 15 | F | CMC,<br>AD, HP,<br>GI,<br>GHD, K                       | + | + | + | + | no changes<br>visible on<br>mucous<br>membranes | <i>Candida<br/>albicans</i><br>neg /<br>36      | no               | ✓ | ✓ |  | ✓ |
| <b>PT12</b> | R92W/R257X           | 55 | F | HP, AD                                                 | + | - | - | + |                                                 |                                                 |                  |   | ✓ |  |   |
| <b>PT13</b> | R257X/R257X          | 12 | M | CMC,<br>AD, HP,<br>ND                                  | + | - | + | + |                                                 |                                                 |                  |   | ✓ |  |   |

**Supplementary Table 2.** Used antibodies. Surface marker expression on PBMCs was assessed by flow cytometry in 8 Slovenian patients and 8 age matched control subjects. Cells were stained in flow cytometry buffer (PBS (pH 7.2), 2mM EDTA, 0.5% BSA) for 20 min at room temperature in dark with antibodies.

| Antibody and dye             | Manufacturer | Clone   |
|------------------------------|--------------|---------|
| APC-Cy7 CD56                 | Biolegend    | HCD56   |
| Brilliant Violet 650 CD3     | Biolegend    | OKT3    |
| FITC TCR Vd1                 | Thermo       | TS8.2   |
| PE TCR Vd2                   | Biolegend    | B6      |
| APC CD1d dextramer           | Immudex      | -       |
| Brilliant Violet 510 TCR va7 | Biolegend    | 3C10    |
| PerCP-Cy5.5 CD161            | Biolegend    | HP-3G10 |

**Supplementary Table 3.** Optical detector configuration details. Surface marker expression on PBMCs was assessed by flow cytometry in 8 Slovenian patients and 8 age matched control subjects. After staining cells were analyzed using LSRFortessa flow cytometer (BD Biosciences).

| Laser                          | PMT | Channel | LP Mirror | BP Filter |
|--------------------------------|-----|---------|-----------|-----------|
| 488-nm blue laser<br>Octagon   | A   | FL3     | 685       | 710/50    |
|                                | B   | FL2     | 505       | 530/30    |
|                                | C   | FL1     | -         | 488/10    |
| 405-nm violet laser<br>Octagon | A   | FL9     | 670       | 710/40    |
|                                | B   | FL8     | 630       | 670/30    |
|                                | C   | FL7     | 600       | 610/20    |
|                                | D   | FL6     | 535       | 540/30    |
|                                | E   | FL5     | 505       | 525/50    |
|                                | F   | FL4     | -         | 440/40    |
| 561-nm YG laser<br>Octagon     | A   | FL19    | 750       | 780/60    |
|                                | B   | FL18    | 685       | 710/50    |
|                                | C   | FL17    | 635       | 670/30    |
|                                | D   | FL16    | 600       | 610/20    |
|                                | E   | FL15    | -         | 586/15    |
| 355-nm UV laser                | A   | FL11    | 635       | 740/40    |

|                            |   |      |     |        |
|----------------------------|---|------|-----|--------|
| Trigon                     | B | FL10 | -   | 450/50 |
| 640-nm red laser<br>Trigon | A | FL14 | 750 | 780/60 |
|                            | B | FL13 | 690 | 730/45 |
|                            | C | FL12 | -   | 670/14 |

**Supplementary Table 4.** Human Magnetic Luminex Performance Assay Kits. Cytokine levels in saliva samples and EDTA-treated plasma samples patients were measured by the xMAP Technology on Luminex 200 with Human Magnetic Luminex Performance Assay Kits (R&D Systems, Minneapolis, MN).

| <b>Kits</b>                                                  | <b>Cytokines</b>                                                                      |
|--------------------------------------------------------------|---------------------------------------------------------------------------------------|
| Human Magnetic Luminex Performance Assay Base kit A          | IL-1ra/IL-1F3, IL-1 $\alpha$ /IL-1F1, G-CSF, CXCL8/IL8                                |
| Human Mag Luminex Performance Assay Base Kit, HS Cytokine A  | TNF- $\alpha$ , IL-10, IL-6, IL-5, IL-2, IL-1 $\beta$ /IL-1F2, IFN- $\gamma$ , GM-CSF |
| Human Mag Luminex Performance Assay Base Kit, HS Cytokine B  | IL-22, IL-17A, IL-17F, IL-36 $\beta$ , IL-7, IL-31                                    |
| Human Mag Luminex Performance Assay Base kit, Kidney Biomark | Lipocalin-2/NGAL, CXCL10/IP10                                                         |

**Supplementary Table 5.** Cytokines detected from saliva and plasma. In plasma samples the measurements of IL-1a fell below detection limit, therefore were excluded from the results. In addition, IL-17A, IL-17F and IL-22 fell below detection limit in both plasma and saliva samples, therefore they were excluded from the results. Lower limit of detection (LOD) according to the manufacturer.

| <b>Cytokine</b> | <b>LOD</b> | <b>Sample</b> | <b>Patient n/ Control n</b> | <b>Patient mean <math>\pm</math> SD</b> | <b>Control mean <math>\pm</math> SD</b> |
|-----------------|------------|---------------|-----------------------------|-----------------------------------------|-----------------------------------------|
| IL-36 $\beta$   | 0.49       | Saliva        | 10 / 8                      | 350.8 $\pm$ 232.6                       | 632.9 $\pm$ 749.9                       |
|                 |            | Plasma        | 8 / 9                       | 3.54 $\pm$ 6.87                         | 4.73 $\pm$ 10.24                        |
| IL-7            | 0.80       | Saliva        | 10 / 8                      | 9.26 $\pm$ 3.70                         | 9.63 $\pm$ 8.54                         |
|                 |            | Plasma        | 8 / 9                       | 20.36 $\pm$ 10.29                       | 19.25 $\pm$ 14.89                       |
| TNF- $\alpha$   | 0.81       | Saliva        | 6 / 6                       | 123.0 $\pm$ 74.79                       | 20.85 $\pm$ 9.17                        |
|                 |            | Plasma        | 7 / 8                       | 10.39 $\pm$ 3.97                        | 8.02 $\pm$ 2.73                         |
| IL-1 $\beta$    | 0.34       | Saliva        | 6 / 6                       | 452.7 $\pm$ 405.0                       | 118.9 $\pm$ 120.2                       |
|                 |            | Plasma        | 7 / 8                       | 1.13 $\pm$ 0.40                         | 1.01 $\pm$ 0.57                         |
| IL-6            | 0.93       | Saliva        | 6 / 6                       | 16.50 $\pm$ 6.82                        | 12.77 $\pm$ 14.79                       |
|                 |            | Plasma        | 7 / 8                       | 1.70 $\pm$ 0.37                         | 1.74 $\pm$ 1.54                         |

|                       |       |        |        |               |                |
|-----------------------|-------|--------|--------|---------------|----------------|
| IL-10                 | 0.46  | Saliva | 6 / 5  | 2.49 ± 2.90   | 1.65 ± 1.78    |
|                       |       | Plasma | 7 / 8  | 5.47 ± 11.40  | 0.67 ± 0.55    |
| GM-CSF                | 0.39  | Saliva | 6 / 5  | 4.04 ± 0.83   | 1.47 ± 0.37    |
|                       |       | Plasma | 7 / 8  | 0.57 ± 0.44   | 0.49 ± 0.67    |
| IFN- $\gamma$         | 0.31  | Saliva | 6 / 5  | 1.10 ± 0.69   | 0.04 ± 0.08    |
|                       |       | Plasma | 7 / 8  | 0.54 ± 1.25   | 0.07 ± 0.06    |
| CXCL10/IP10           | 3.65  | Saliva | 10 / 8 | 398.7 ± 345.4 | 168.9 ± 94.07  |
|                       |       | Plasma | 8 / 9  | 133.2 ± 73.92 | 75.24 ± 23.16  |
| Lipocalin-2/NGAL      | 41.15 | Saliva | 10 / 8 | 99355 ± 26968 | 119377 ± 27764 |
|                       |       | Plasma | 8 / 9  | 33938 ± 22667 | 32814 ± 18470  |
| G-CSF                 | 5.83  | Saliva | 10 / 8 | 72.96 ± 44.06 | 96.21 ± 37.96  |
|                       |       | Plasma | 8 / 9  | 22.01 ± 11.32 | 20.32 ± 8.52   |
| IL-1 $\alpha$ /IL-1F1 | 2.88  | Saliva | 10 / 8 | 349.4 ± 196.0 | 572.7 ± 540.8  |
|                       |       | Plasma | -      | -             | -              |
| IL-1ra/IL-1F3         | 6.52  | Saliva | 10 / 8 | 64908 ± 20442 | 73890 ± 34548  |
|                       |       | Plasma | 8 / 9  | 1123 ± 856.8  | 1645 ± 548.3   |
| CXCL8/IL-8            | 3.77  | Saliva | 10 / 8 | 3255 ± 3023   | 1727 ± 1211    |
|                       |       | Plasma | 8 / 9  | 14.31 ± 7.86  | 12.53 ± 16.10  |

**Supplementary Table 6.** Genome-wide gene expression analysis was carried out using HumanHT-12 v4 Expression BeadChip (Illumina Inc., CA, USA) and the signals were scanned using a Beadscan (Illumina Inc.). Array data were analyzed using GenomeStudio software (Illumina, San Diego, CA, USA). Rank invariant normalization was applied. Genes with the FDR adjusted  $p$ -value  $< 0.1$  and a fold change  $> 1.5$  were considered to be differentially expressed. A positive diffScore represents upregulation, while a negative diffScore represents downregulation. The  $p$ -value for an observed expression difference between two analyzed groups of samples is  $< 0.05$  for genes with diffScores of lower than -13 and higher than +13 ( $p$ -value  $< 0.01$  is  $-20 > \text{diffScore} > 20$ ;  $p$ -value  $< 0.001$  is  $-33 > \text{diffScore} > 33$ ).

The Supplementary Table 6 can be found as a separate excel file (the  $p$ -values  $< 0.05$  are marked in bold).

**Supplementary Table 7.** Diseases and functions top 10. The core analysis was carried out on reference set Ingenuity Knowledge Base (Genes only). The settings were by default including direct and indirect relationships between genes, 35 genes per network, 25 networks per analysis. Diseases and functions

analysis was conducted, which predicted effected biology (cellular processes, biological functions) based on gene expression. *P*-value was calculated using a Right-Tailed Fisher's Exact Test.

| Categories                        | Function               | Diseases or function annotations          | <i>p</i> -value | Predicted activation state | Activation z-score | Molecules                                                                                                                                                                                                | # molecules |
|-----------------------------------|------------------------|-------------------------------------------|-----------------|----------------------------|--------------------|----------------------------------------------------------------------------------------------------------------------------------------------------------------------------------------------------------|-------------|
| Cell cycle                        | Cell cycle progression | Cell cycle progression                    | 3.57E-08        | Decreased                  | -2.256             | ACVRL1 ↑, DDR2 ↑, HAT1 ↓, NEK2 ↓, PPM1D ↓, TTK ↓, CDKN3 ↓, DLGAP5* ↓, HMGB1 ↓, NET1 ↓, RPA3 ↓, UCHL5 ↓, CEACAM1 ↓, DTL ↓, KIF11 ↓, NOTCH2 ↓, SPRR2B ↓, USP16 ↓, CLTC ↓, FANCG ↑, KLF5 ↓, PCLAF ↓, TGFA ↓ | 23          |
| Cellular function and maintenance | Endocytosis            | Endocytosis by cervical cancer cell lines | 6.23E-06        |                            | -0.628             | CLTC ↓, TGFA ↓, FCHO2 ↓, DAB2 ↑, SHANK3* ↑                                                                                                                                                               | 5           |
| Cell cycle                        | Interphase             | Interphase                                | 7.19E-06        |                            | -1.633             | ACVRL1 ↑, KIF11 ↓, ORC3 ↓, SNHG7* ↑, CDKN3 ↓, NEK2 ↓, PCLAF ↓, TGFA ↓, DAB2 ↑, NET1 ↓, PPM1D ↓, TNFRSF14 ↑, DTL ↓, NOTCH2 ↓, RPA3 ↓, USP8 ↓                                                              | 16          |
| Cell cycle                        | Mitosis                | Mitosis                                   | 1.78E-05        |                            | -0.876             | CDKN3 ↓, HAT1 ↓, RPA3 ↓, CEACAM1 ↓, KIF11 ↓, TGFA ↓, CLTC ↓, NEK2 ↓, TTK ↓, DLGAP5* ↓, PPM1D ↓, USP16 ↓                                                                                                  | 12          |

|                                                                       |                             |                                        |          |  |  |                                                                                                                                                                                                                                                                                                                                                                                                                                                                                                                                                                                                                                                   |    |
|-----------------------------------------------------------------------|-----------------------------|----------------------------------------|----------|--|--|---------------------------------------------------------------------------------------------------------------------------------------------------------------------------------------------------------------------------------------------------------------------------------------------------------------------------------------------------------------------------------------------------------------------------------------------------------------------------------------------------------------------------------------------------------------------------------------------------------------------------------------------------|----|
| Cancer, organismal injury and abnormalities                           | Breast or colorectal cancer | Breast or colorectal cancer            | 2.25E-05 |  |  | ACVRL1 ↑,<br>C1QRNF5 ↑,<br>CLPX ↓,<br>DLGAP5* ↓,<br>FANCG ↑,<br>INPPL1 ↑,<br>METTL5 ↓, NNT ↓,<br>PAK1IP1 ↓,<br>PGK1 ↓,<br>RAD51AP1 ↓,<br>SMPDL3A ↓,<br>TMEM 126A ↓,<br>USP16 ↓,<br>ADCY4 ↑, CD58 ↓,<br>CRYZ ↓, DST ↓,<br>FCHO2 ↓,<br>KIF11 ↓, NEK2 ↓,<br>NOTCH2 ↓,<br>PBK ↓, PLCH2 ↑,<br>SERPING1 ↑,<br>SRP19 ↓, TTK ↓,<br>VSIG8 ↓,<br>AFTPH ↓,<br>CDKN3 ↓, DAB2 ↑,<br>DTL ↓, HAT1 ↓,<br>KLF5 ↓, NET1 ↓,<br>NUP54 ↓,<br>PCLAF ↓,<br>PPM1D ↓,<br>SHANK3* ↑,<br>TAF1B ↓,<br>TXNDC9 ↓,<br>YES1 ↓, BCL10 ↓,<br>CEACAM1 ↓,<br>DDR2 ↑,<br>EIF1AX ↓,<br>HMGB1 ↓,<br>KTN1 ↓, NISCH ↑,<br>OLFML3 ↑,<br>PDCD10 ↓,<br>PRDM1 ↓, SMC2 ↓,<br>TGFA ↓,<br>UCHL5 ↓ | 55 |
| Cellular assembly and organization, cellular function and maintenance | Formation                   | Formation of artificial clathrin cages | 3.18E-05 |  |  | CLTC ↓, FCHO2 ↓,<br>DAB2 ↑                                                                                                                                                                                                                                                                                                                                                                                                                                                                                                                                                                                                                        | 3  |
| Cell cycle                                                            | Mitosis                     | Mitosis of tumor cell lines            | 6.52E-05 |  |  | CLTC ↓, PPM1D ↓,<br>TTK ↓,<br>DLGAP5* ↓,<br>KIF11 ↓, NEK2 ↓                                                                                                                                                                                                                                                                                                                                                                                                                                                                                                                                                                                       | 6  |

|                                                                                 |            |                                                 |          |  |        |                                                                                      |    |
|---------------------------------------------------------------------------------|------------|-------------------------------------------------|----------|--|--------|--------------------------------------------------------------------------------------|----|
| Cell cycle                                                                      | Mitosis    | Mitosis of cervical cancer cell lines           | 1.13E-04 |  |        | CLTC ↓, TTK ↓, DLGAP5* ↓, KIF11 ↓, NEK2 ↓                                            | 5  |
| Cell cycle                                                                      | Interphase | Interphase of tumor cell lines                  | 1.16E-04 |  | -1.342 | CDKN3 ↓, NET1 ↓, SNHG7* ↑, DAB2 ↑, NOTCH2 ↓, TGFA ↓, DTL ↓, ORC3 ↓, KIF11 ↓, PCLAF ↓ | 10 |
| Hematological system development and function, hematopoiesis, tissue morphology | Quantity   | Quantity of short-term hematopoietic stem cells | 1.52E-04 |  |        | KLF5 ↓, PCLAF ↓                                                                      | 2  |

**Supplementary Table 8.** Networks of gene interactions. Networks are assembled based on gene connectivity with other genes using decreasingly connected molecules from data set. The score ( $p\text{-score} = -\log_{10}(p\text{-value})$ ) is generated according to the fit of the set of supplied genes and a list of biological functions stored in the Ingenuity Knowledge Base. Focus Genes (or Focus Molecules) are those from the uploaded list that pass filters and are eligible for generating networks, i.e., potentially could be linked to some other genes.

| ID | Molecules in network (max 35)                                                                                                                                                                                                                                                                                         | Score | Focus molecules                                                                                                                                                                                                           | Top diseases and functions                                                       |
|----|-----------------------------------------------------------------------------------------------------------------------------------------------------------------------------------------------------------------------------------------------------------------------------------------------------------------------|-------|---------------------------------------------------------------------------------------------------------------------------------------------------------------------------------------------------------------------------|----------------------------------------------------------------------------------|
| 1  | ADCY4 ↑, CDKN3 ↓, NEK2 ↓, PGK1 ↓, S100A12 ↓, UBLCP1 ↓, DAB2 ↑, NOTCH2 ↓, PNP ↓, TGFA ↓, UCHL5 ↓, VPS50 ↓, DEFB103A/DEFB103b ↓, FANCG ↑, PAIP2 ↓, PPM1D ↓, TMEM126A ↓, USP16 ↓, YES1 ↓, FCHO2 ↓, PBK ↓, TTK ↓, USP8 ↓, E2f, FSH, Vegf, ADRB, ERK1/2, Lh, Ap1, Mapk, Cdk, DUB, NADPH oxidase, pro-inflammatory cytokine | 51    | 23 (ADCY4 ↑, CDKN3 ↓, NEK2 ↓, PGK1 ↓, S100A12 ↓, UBLCP1 ↓, DAB2 ↑, NOTCH2 ↓, PNP ↓, TGFA ↓, UCHL5 ↓, VPS50 ↓, DEFB103A/DEFB103b ↓, FANCG ↑, PAIP2 ↓, PPM1D ↓, TMEM126A ↓, USP16 ↓, YES1 ↓, FCHO2 ↓, PBK ↓, TTK ↓, USP8 ↓) | Antimicrobial response, cellular function and maintenance, inflammatory response |
| 2  | CLTC ↓, HAT1 ↓, HMGB1 ↓, KRT3 ↓, SLBP ↓, NET1 ↓, PRDM1 ↓, BCL10 ↓, CD58 ↓, DDR2 ↑, NUP54 ↓, SDHD ↓, TNFRSF14 ↑, CEACAM1 ↓, DTL ↓, INPPL1 ↑, ORC3 ↓, SERPING1 ↑, actin,                                                                                                                                                | 37    | 18 (CLTC ↓, HAT1 ↓, HMGB1 ↓, KRT3 ↓, SLBP ↓, NET1 ↓, PRDM1 ↓, BCL10 ↓, CD58 ↓, DDR2 ↑, NUP54 ↓, SDHD ↓, TNFRSF14 ↑,                                                                                                       | Cellular movement, hematological system development and                          |

|   |                                                                                                                                                                                                                                                                                                                                                            |    |                                                                                                                                    |                                                                                            |
|---|------------------------------------------------------------------------------------------------------------------------------------------------------------------------------------------------------------------------------------------------------------------------------------------------------------------------------------------------------------|----|------------------------------------------------------------------------------------------------------------------------------------|--------------------------------------------------------------------------------------------|
|   | caspase, IL1, PI3K (complex), Akt, CD3, collagen(s), HISTONE, IgG, IL12 (complex), Tgf beta, histone H3, IgG2a, immunoglobulin, BCR (complex), histone h4, Igm                                                                                                                                                                                             |    | CEACAM1 ↓, DTL ↓, INPPL1 ↑, ORC3 ↓, SERPING1 ↑)                                                                                    | function, immune cell trafficking                                                          |
| 3 | NISCH ↑, PUDP ↓, BRIX1 ↓, NM37 ↓, TGM5 ↓, VSIG8 ↓, CLPX ↓, METTL5 ↓, TMEM154 ↓, CRYZ ↓, MICU2 ↓, PSMG1 ↓, SHANK3 ↑, TMEM199 ↓, ACOX2, beta-estradiol, CTNNB1, SLC17A1, SPATA13, TTC17, ACOX3, ESR2, Macf1, RAB5C, SLC38A5, ARHGAP44, HCN3, NXF1, RHBDF1, SLFN11, WDTC1, BAMBI, HNF4A, SMARCA4                                                              |    | 14 (NISCH ↑, PUDP ↓, BRIX1 ↓, NM37 ↓, TGM5 ↓, VSIG8 ↓, CLPX ↓, METTL5 ↓, TMEM154 ↓, CRYZ ↓, MICU2 ↓, PSMG1 ↓, SHANK3 ↑, TMEM199 ↓) | Cancer, cell death and survival, organismal injury and abnormalities                       |
| 4 | KIF11 ↓, PCLAF ↓, PLCH2 ↑, SMPDL3A ↓, UQCRH ↓, EIF1AX ↓, NNT ↓, SPRR2B ↓, TTC33 ↓, ZFAND1 ↓, TAF1B ↓, TXNDC9 ↓, ADGRE5, CKMT2, EXPH5, NAB1, SL1, TP53, UQCR10, ADGRL1, CTIF, FAM84B, LCOR, NEIL3, TSPAN15, AGTR1, GPRC5C, LZTS1, PLEKHA3, CELSR3, ELAVL1, hydrogen peroxide, Mpf, NT5DC3, progesterone                                                     | 22 | 12 (KIF11 ↓, PCLAF ↓, PLCH2 ↑, SMPDL3A ↓, UQCRH ↓, EIF1AX ↓, NNT ↓, SPRR2B ↓, TTC33 ↓, ZFAND1 ↓, TAF1B ↓, TXNDC9 ↓)                | Cell death and survival, cellular compromise, hair and skin development and function       |
| 5 | AFTPH ↓, RPA3 ↓, TCEAL9 ↓, DST ↓, RAB6A ↓, HTR3A ↓, LXN ↓, RAD51AP1 ↓, SMC2 ↓, IRX3 ↓, OLFML3 ↑, SRP19 ↓, DOK4, EGFR ligand, GPAA1, LIG4, NCAPG2, PAXX, ANKS1B, Egfr-ErbB2, GRID1, LMBR1, NHEJ1, SLFN11, TRMO, C1QL4, EBP, ERBB2, NTHL1, UQCR10, COL17A1, EGFR, FUT8, MAP7D2, RIC3                                                                         | 22 | 12 (AFTPH ↓, RPA3 ↓, TCEAL9 ↓, DST ↓, RAB6A ↓, HTR3A ↓, LXN ↓, RAD51AP1 ↓, SMC2 ↓, IRX3 ↓, OLFML3 ↑, SRP19 ↓)                      | Cell cycle, cell morphology, DNA replication, recombination, and repair                    |
| 6 | DEFB103A/DEFB103b ↓, KLF5 ↓, DLGAP5 ↓, KTN1 ↓, PAK1IP1 ↓, ACVRL1 ↑, PDCD10 ↓, C1QTNF5 ↑, KCNK1 ↓, S100A12 ↓, 26s Proteasome, Calmodulin, GJC1, Mmp, P38 MAPK, PELI2, TAC4, acetaldehyde, CGREF1, insulin, neopretin, Pkc(s), TCR, Crisp1/Crisp3, ERK, Jnk, MAP3K13, NEUROD6, RHBDD3, Trbd1, cytokine, focal adhesion kinase, MIP1, NFkB (complex), PDGF BB | 17 | 10 (DEFB103A/DEFB103b ↓, KLF5 ↓, DLGAP5 ↓, KTN1 ↓, PAK1IP1 ↓, ACVRL1 ↑, PDCD10 ↓, C1QTNF5 ↑, KCNK1 ↓, S100A12 ↓)                   | Cardiovascular system development and function, organismal development, tissue development |
| 7 | SNHG7 ↑, FAIM2                                                                                                                                                                                                                                                                                                                                             | 2  | 1 (SNHG7 ↑)                                                                                                                        | Cell cycle, cell death and survival, tissue morphology                                     |

**Supplementary Table 9.** Top two master regulators. Participating regulators are molecules through which the upstream regulator molecule controls the expression of target molecules in dataset. Depth is the degree of separation between the upstream regulator and the downstream target molecules in dataset (1-3). Target connected regulators is the count of the regulators that interact with at least one target molecule in the dataset.

| Master regulator | Molecule type                     | Participating regulators                                                                                                                                                                                          | Depth | Predicted activation | Activation z-score | <i>p</i> -value of overlap | Network bias-corrected <i>p</i> -value | Target genes in dataset                                                                                                                                                                                                       | Causal network |
|------------------|-----------------------------------|-------------------------------------------------------------------------------------------------------------------------------------------------------------------------------------------------------------------|-------|----------------------|--------------------|----------------------------|----------------------------------------|-------------------------------------------------------------------------------------------------------------------------------------------------------------------------------------------------------------------------------|----------------|
| TFIIH            | Complex                           | ATF4, CCND1, CCNH, CDK7, CDK9, CEBPA, CREB1, EGFR, ESR1, GATA1, IL2, MNAT1, MYOD1, NCOA3, NELFE, NFKBIA, NR5A1, PGR, POU5F1, PPARA, PPARG, PPARGC1A, progesterone, SP1, SRC, STAT1, STAT3, SUB1, tamoxifen, TFIIH | 3     | Inhibited            | -2.611             | 9.71E-07                   | 2.30E-03                               | ACVRL1, ADCY4, BCL10, C1QTNF5, CD58, CDKN3, CEACAM1, DAB2, DDR2, DLGAP5, DST, DTL, EIF1AX, HTR3A, INPPL1, IRX3, KTN1, LXN, OLFML3, PAIP2, PBK, PGK1, PNP, PRDM1, RAB6A, SMPDL3A, TCEAL9, TGFA, TTK, UCHL5, UQCRH, USP16, YES1 | 33 (30)        |
| AHR              | Ligand-dependent nuclear receptor | AHR, Akt, ARNT, EGFR, ERK, ESR1, IL22, Jnk, MITF, NFKBIA, P38 MAPK, RAF1, RB1, RELA, SMAD2, tanespimycin, ZFP36                                                                                                   | 2     | -                    | 0.192              | 1.38E-06                   | 3.40E-03                               | C1QTNF5, CDKN3, DAB2, DEFB103A/DEFB103B, DST, FANCG, HAT1, KIF11, KLF5, KTN1, NEK2, NET1, NOTCH2, PAIP2, PBK, PCLAF, PGK1, PNP, PPM1D, PRDM1, RAB6A, RPA3, S100A12, SDHD, TCEAL9, TNFRSF14, TTK                               | 27 (17)        |
